# Supplementary material for: Distinguishing eastern North American forest moth pests by wing-scale ultrastructure: potential applications in paleoecology
Source: Atypon-hosted journal article supplement (doi:10.1139/facets-2018-0051), 2019-06-01
Supplement: facets-2018-0051_supplement1.csv [file facets-2018-0051_supplement1.csv]

Individual	Species	Sex	cross_ribs	dist_cross_ribs	dist_long_ridges	width_long_ridges	pores	pore_width	pore_height	pore_area	pore_eccentricity	forking	var_dist_cross_ribs
1	EBB	F	17.6	0.2534	1.9352	0.2356	0					0.5	0.00092
2	EBB	F	16.7	0.2685	1.9206	0.1884	0					0	0.001516
3	EBB	F	18.1	0.2676	2.0442	0.2142	0					0.3	0.000588
4	EBB	F	17	0.2673	2.081	0.2446	0					0.1	0.001301
5	EBB	F	18.6	0.246	2.0882	0.2464	0.6	0.188	0.202	0.030473	1.094823	0.1	0.001848
6	EBB	F	17.1	0.2708	2.1112	0.242	0.1	0.234	0.206	0.038186	0.889055	0	0.001147
7	EBB	M	19.5	0.2621	1.7574	0.2414	0.1	0.19	0.16	0.023876	0.842105	0	0.001158
8	EBB	M	18.9	0.2696	1.7874	0.2248	0.4	0.166	0.148	0.019494	0.8875	0	0.001325
9	EBB	M	18.5	0.2848	1.9588	0.2168	0.2	0.2125	0.185	0.033438	0.934592	0.1	0.00069
10	EBB	M	19.5	0.2666	1.891	0.2458	0	0.2025	0.1615	0.025737	0.861957	0	0.000732
11	EBB	M	19	0.2748	1.8418	0.2236	0.1	0.2175	0.185	0.031933	0.886649	0	0.000734
12	EBB	M	19.3	0.2682	1.865	0.2248	0	0.16474	0.15579	0.020482	0.979911	0.1	0.001215
13	FTC	F	23.5	0.1944	2.4463	0.2602	5.1	0.529	0.533	0.227296	1.027786	0.6	0.000873
14	FTC	F	21.7	0.1904	2.253	0.2866	5.6	0.6206	0.5296	0.263661	0.863973	0.2	0.001004
15	FTC	F	22.2	0.1962	2.3306	0.2474	5.7	0.5538	0.511	0.225524	0.93311	0.3	0.000878
16	FTC	F	21.4	0.1985	2.3694	0.2714	6.2	0.4744	0.4508	0.177819	0.96124	0.4	0.000898
17	FTC	F	23.1	0.1908	2.3194	0.2806	6.8	0.5692	0.5018	0.235541	0.895987	0.2	0.001153
18	FTC	F	21.7	0.1846	2.3523	0.2653	5.8	0.5456	0.5268	0.23312	0.97373	0.8	0.001116
19	FTC	M	23.2	0.1943	2.8098	0.3019	6.5	0.507	0.4204	0.173463	0.848728	0.1	0.001219
20	FTC	M	22.5	0.2243	2.1614	0.2476	5.8	0.53	0.4816	0.212854	0.91635	0.5	0.016594
21	FTC	M	21.3	0.1878	2.3546	0.2332	5.1	0.5288	0.5222	0.227717	0.9836	0.4	0.000773
22	FTC	M	22.6	0.1891	2.3288	0.2592	5.7	0.5948	0.485	0.232561	0.824499	0.9	0.001105
23	FTC	M	21.9	0.1973	1.939	0.25	4.6	0.4702	0.4656	0.182443	1.000042	0.9	0.001131
24	FTC	M	21.1	0.1847	2.3728	0.2808	5.3	0.5356	0.5146	0.225431	0.962944	0.8	0.000742
25	HL	F	8.3	0.7226	1.991	0.2674	3.6	0.27686	0.32029	0.074994	1.142899	0.1	0.105127
26	HL	F	8.1	0.7572	1.9324	0.2452	2.6	0.23735	0.29265	0.061892	1.184736	0.2	0.109778
27	HL	F	9.1	0.7565	2.0772	0.24	1.4	0.266	0.3375	0.074279	1.299918	0.1	0.174413
28	HL	F	8.6	0.7871	2.0128	0.1988	1.7	0.28609	0.34304	0.081869	1.197252	0.1	0.174029
29	HL	F	9	0.7859	2.0142	0.238	3.6	0.22257	0.26629	0.050317	1.224081	0.2	0.204519
30	HL	F	10.6	0.6804	1.9974	0.202	0.9	0.2	0.261	0.041178	1.323112	0.8	0.115081
31	HL	M	9.4	0.6001	1.7978	0.2474	4.1	0.24514	0.26743	0.054498	1.109449	0.4	0.095504
32	HL	M	8.4	0.7592	1.841	0.2332	4.2	0.2705	0.351	0.078805	1.324176	0.2	0.11865
33	HL	M	10.7	0.6355	2.0222	0.2062	1.6	0.262	0.327	0.069688	1.275031	0.2	0.124261
34	HL	M	8.6	0.6237	1.6214	0.2012	2.7	0.2912	0.3972	0.093692	1.371992	0.2	0.118209
35	HL	M	9.4	0.6254	2.1248	0.2376	3	0.29714	0.37086	0.091283	1.244907	0	0.113124
36	HL	M	10	0.6524	2.027	0.2318	3.8	0.262	0.29886	0.064461	1.14015	0.1	0.108627
37	JPBW	F	17.8	0.2665	2.127	0.3038	7.4	0.24911	0.24622	0.048834	0.994621	0	0.002748
38	JPBW	F	18	0.2651	2.1692	0.3092	1.8	0.26061	0.25515	0.057394	0.980914	0	0.002058
39	JPBW	F	16.1	0.2756	2.5072	0.3268	3.8	0.2594	0.266	0.054926	1.036759	0	0.004033
40	JPBW	F	17.7	0.2576	2.3932	0.2918	7.4	0.2314	0.235	0.044245	1.043757	0	0.003463
41	JPBW	F	16.4	0.2747	2.6165	0.311	4.1	0.2586	0.2464	0.051943	0.963178	0	0.00292
42	JPBW	F	17.5	0.266	2.5979	0.3398	3.9	0.28053	0.27132	0.061565	0.983467	0.1	0.002945
43	JPBW	M	19.6	0.2667	2.3276	0.29	8.2	0.2124	0.2232	0.038594	1.068682	0	0.002182
44	JPBW	M	19.8	0.268	2.3156	0.2774	8.7	0.2182	0.2138	0.038565	1.011763	0	0.003455
45	JPBW	M	19.8	0.2697	2.3144	0.2782	8	0.2242	0.2254	0.043134	1.010241	0	0.003328
46	JPBW	M	20	0.2657	2.153	0.293	8.2	0.218	0.2134	0.036988	0.996779	0	0.003085
47	JPBW	M	19.5	0.2701	2.5118	0.3138	7.2	0.2236	0.225	0.041755	1.009382	0	0.002625
48	JPBW	M	19.9	0.2699	2.3842	0.3082	7.1	0.2212	0.2196	0.039403	1.000883	0	0.003136
49	SBW	F	20.2	0.2725	2.5282	0.3358	9.1	0.1668	0.1908	0.026652	1.173959	0	0.003391
50	SBW	F	20.6	0.2671	2.3024	0.3026	10.1	0.2404	0.2466	0.048665	1.041548	0	0.00752
51	SBW	F	19.4	0.2767	2.4362	0.3722	9	0.1852	0.1948	0.03012	1.071939	0	0.004881
52	SBW	F	19.6	0.2692	2.5173	0.3792	8.4	0.237	0.247	0.048627	1.05679	0.1	0.004745
53	SBW	F	19.2	0.2674	2.3606	0.3796	9.4	0.1838	0.1872	0.028485	1.038899	0	0.00352
54	SBW	F	18.9	0.2746	2.4514	0.3668	7.4	0.2258	0.2352	0.043032	1.057625	0	0.003868
55	SBW	M	20.1	0.256	2.1638	0.3228	9.6	0.2192	0.2356	0.041142	1.116658	0	0.004356
56	SBW	M	19.8	0.2495	2.1492	0.2902	7.3	0.2156	0.2232	0.03916	1.049978	0.1	0.002954
57	SBW	M	19.8	0.2496	2.4254	0.3468	9.1	0.2286	0.2298	0.04311	1.024848	0	0.005218
58	SBW	M	20.2	0.2414	2.119	0.2876	7.9	0.2244	0.2234	0.040286	1.012698	0	0.00355
59	SBW	M	19.2	0.2512	2.5712	0.3264	8.3	0.2146	0.2118	0.037157	0.995951	0.1	0.00193
60	SBW	M	19.7	0.2547	2.2662	0.3372	10	0.2278	0.2196	0.040597	0.963708	0	0.002763
